# Supplementary material for: Dynamic changes in moisture content and applicability analysis of a typical litter prediction model in Yunnan Province
Source: PeerJ. 2021 Sep 30;9:e12206. doi: 10.7717/peerj.12206 (PMC8487626; doi:10.7717/peerj.12206)
Supplement: Supplemental Information 1 [file peerj-09-12206-s001.xlsx]

## Sheet: moisture data
	Daily moisutre conteng of litter in eight plots
date	Py1	Py2	Pa3	Pa4	Pa5	Po6	Py-pa7	Py-pa8
2014.2.19	75.8497	86.9243	134.452	141.768	124.35	116.015	111.241	78.784
2014.2.20	74.6834	51.021	83.9606	88.8057	80.7913	118.069	61.3807	51.8767
2014.2.21	42.1018	31.4483	46.2033	61.3751	51.2711	42.8727	38.164	31.3016
2014.2.22	19.7795	19.0424	54.1701	27.0726	27.9474	35.4095	21.775	15.0088
2014.2.23	22.803	20.5026	27.0624	29.4285	28.7971	24.3276	23.5316	18.4509
2014.2.24	21.5898	18.8238	23.0239	25.6678	24.667	26.0663	21.9447	17.5609
2014.2.25	15.7553	17.5741	23.906	24.4192	26.3722	19.3917	18.4361	17.3758
2014.2.26	21.3886	17.8877	26.0129	26.35	32.3235	21.9601	22.1867	18.7288
2014.2.27	20.8722	16.505	26.023	25.4577	26.1602	21.3758	19.1229	17.3864
2014.2.28	20.3138	16.4043	21.5208	22.2538	26.4236	17.3346	19.0469	16.8633
2014.3.1	18.5398	16.0219	22.568	22.3011	32.7411	18.8707	18.6631	19.7216
2014.3.2	16.2583	18.7257	20.9441	23.0939	24.1333	17.3366	18.504	15.5568
2014.3.3	15.7793	14.8306	23.8536	21.4554	21.3431	19.2719	15.8201	20.2128
2014.3.4	14.8386	19.2379	18.839	21.9519	23.6362	16.1484	18.7873	19.2537
2014.3.5	18.8582	18.1639	24.073	23.5333	30.5346	17.7695	21.5798	17.6648
2014.3.6	15.9127	18.6393	25.8732	32.5319	31.8289	21.3703	23.3039	20.8807
2014.3.7	15.7575	20.3743	29.9778	27.1153	31.2169	21.529	24.622	16.7645
2014.3.8	18.1318	20.8591	24.5606	24.2722	31.9981	17.5101	22.2753	21.2657
2014.3.9	17.0914	17.4906	24.8956	21.8584	29.6174	18.7868	20.3792	24.5459
2014.3.10	15.2652	18.9143	23.8769	26.3998	34.0103	19.0273	23.0622	16.1674
2014.3.11	18.5245	18.9793	25.8792	25.3426	29.2234	20.9174	22.5506	17.3102
2014.3.12	17.6202	15.8773	24.9334	24.4445	28.3265	19.9069	21.7791	17.6558
2014.3.13	19.6241	20.171	25.5497	23.2148	31.3861	19.219	23.6973	16.9371
2014.3.14	36.8667	20.1791	35.2566	36.0813	33.4524	23.4627	41.7097	22.5445
2014.3.15	27.2075	23.9551	39.8704	41.8435	45.7041	28.4832	33.5453	24.6345
2014.3.16	19.3057	19.2041	27.3708	26.4379	33.0104	22.7428	24.7769	19.3934
2014.3.17	18.6045	37.9398	47.1926	26.8823	29.8061	17.4386	23.2984	19.7548
2014.3.18	17.6328	15.7986	26.1627	24.7428	30.0003	18.6094	19.3349	18.1116
2014.3.19	23.5125	17.8375	25.3959	25.1575	34.9226	17.3533	20.9793	18.0144
2014.3.20	17.9313	18.7432	27.414	30.9674	31.8963	20.79	21.623	16.8156
2014.3.21	25.4885	24.7031	35.7643	37.4711	41.2317	26.2118	26.5597	27.039
2014.3.22	65.0679	63.8443	88.3351	78.76	98.4207	39.7158	89.3543	83.8939
2014.3.23	66.8266	66.7226	97.7279	99.0972	111.687	70.2457	100.048	93.3642
2014.3.24	71.0341	72.9097	147.688	99.5866	111.079	106.541	118.965	84.6228
2014.3.25	30.5489	32.8062	50.8493	50.6904	53.3425	34.6817	42.3941	35.8912
2014.3.26	34.0034	27.0624	48.8328	52.467	50.3099	33.0319	37.9625	28.3402
2014.3.27	28.5917	25.3402	35.0687	31.2137	37.9758	25.9691	30.6001	21.4955
2014.3.28	22.1014	21.7322	30.4225	28.4781	33.7615	22.8118	23.9386	19.837
2014.3.29	23.3807	21.3146	66.8335	76.9847	40.4841	23.807	27.7262	18.6027
2014.3.30	21.8364	20.304	27.591	27.329	30.7188	19.8636	24.1045	21.3202
2014.3.31	23.0246	20.876	31.7374	22.7816	29.5627	20.5349	24.0361	21.8563
2014.4.1	24.214	23.3683	32.0007	27.3079	30.3273	23.7544	25.4487	24.9813
2014.4.2	16.5223	19.5464	25.5853	29.4958	30.2756	21.4002	20.7854	16.5248
2014.4.3	22.1389	21.2328	28.8848	26.506	28.5894	18.6677	21.6563	18.919
2014.4.4	15.8788	17.47	26.6327	29.4463	22.868	17.1864	18.7946	11.9671
2014.4.5	12.8316	18.738	26.211	31.1248	20.9066	12.9216	20.1312	16.9969
2014.4.6	36.1118	34.2678	50.5704	45.8365	58.8736	29.3415	57.9931	48.398
2014.4.7	30.864	26.711	42.2356	36.5088	42.0284	29.1264	31.9311	26.435
2014.4.8	26.1909	23.9697	33.9788	31.0827	37.7046	29.0989	24.7428	26.0768
2014.4.9	28.382	27.3405	35.872	31.7155	37.2426	24.3164	28.6132	23.5458
2014.4.10	23.8861	23.1442	32.7086	31.3824	28.1768	21.9474	23.9908	21.8441
2014.4.11	19.8711	20.2238	26.573	24.8509	27.6744	18.6049	23.5244	20.9023
2014.4.12	20.2838	20.3678	27.6685	25.391	31.1568	17.2802	20.5473	18.1135
2014.4.13	16.1033	14.5774	21.2804	21.7034	22.2443	16.5455	18.3357	16.0999
2014.4.14	18.1957	16.3113	24.3681	22.9425	25.5284	16.9474	23.4199	17.4684
2014.4.15	20.979	17.4798	24.222	21.9288	34.295	15.1232	20.7504	17.6248
2014.4.16	22.0211	14.8353	24.961	20.465	20.6226	14.5591	19.9085	15.837
2014.4.17	15.7496	14.4871	24.787	19.771	21.2405	15.068	18.4581	16.9193
2014.4.18	19.0727	12.1426	33.7257	20.8653	17.6255	14.616	16.8181	16.2027
2014.4.19	15.6872	12.863	21.5152	20.0766	16.8943	15.2641	17.134	14.7838
2014.4.20	15.017	15.1041	21.2467	20.7993	17.3674	15.3669	16.6238	15.7009
2014.4.21	15.1708	14.3151	17.79	17.3648	15.9889	14.8143	16.311	14.597
2014.4.22	20.4218	16.2727	26.4279	22.1824	22.5928	18.2321	19.551	16.9217
2014.4.23	16.3996	12.7473	18.6649	19.1555	15.647	13.884	15.2567	12.9459
2014.4.24	16.9659	14.2798	20.8978	17.4178	15.647	12.708	16.3619	13.661
2014.4.25	15.7819	11.4059	19.1865	17.3023	16.8048	12.8957	14.8181	13.4417
2014.4.26	16.9483	13.0089	20.1434	18.5005	18.8818	13.7137	15.4963	14.7592
2014.4.27	16.6111	17.9856	25.8176	24.7063	19.2919	19.7339	18.6497	19.8271
2014.4.28	15.1054	17.0549	21.0858	23.7699	19.6629	19.47	17.4073	18.5957
2014.4.29	20.8298	21.7081	28.9069	27.5653	26.9894	23.1313	23.4736	19.5554
2014.4.30	91.0789	60.3881	94.2087	79.8716	79.4597	118.465	94.7475	63.0402
2014.5.1	33.8721	31.4653	40.3939	43.9021	39.3616	49.0288	36.7789	28.6113
2014.5.2	108.987	77.5998	98.7512	87.4661	99.6173	99.8625	86.1094	84.9504
2014.5.3	102.749	83.5926	97.4123	106.327	96.2984	130.212	108.072	100.05
2014.5.4	54.9525	41.5295	59.3425	59.2192	49.3021	74.3518	49.7036	48.6
2014.5.5	84.6022	86.4394	113.118	77.745	91.8859	119.736	91.8163	91.831
2014.5.6	52.5937	63.5138	74.4926	68.9837	67.6556	93.0752	74.0435	60.8868
2014.5.7	48.4022	48.6756	61.5527	55.2397	51.2144	63.2884	53.5961	42.3575
2014.5.8	27.4529	30.2109	44.4657	40.7623	42.9414	42.507	35.2534	27.2726
2014.5.9	23.6503	26.3192	36.921	30.1161	29.0721	28.2291	25.5392	22.4195
2014.5.10	25.9333	28.898	37.0198	31.3775	30.047	27.1926	27.2768	25.8644
2014.5.11	26.0097	24.7054	35.6994	28.345	30.8864	24.1054	26.8129	21.5232
2014.5.12	24.7769	19.9411	31.2851	27.0288	25.6235	23.0669	22.2149	21.7223
2014.5.13	22.4177	18.8348	30.3396	21.3009	28.0137	20.7222	22.3643	22.2007
2014.5.14	23.1863	14.8432	23.2488	19.6376	21.3546	17.7205	18.0143	15.8677
2014.5.15	30.1016	15.7637	26.0621	23.5685	25.5271	18.9488	19.1368	17.0438
2014.5.16	19.9798	13.2751	20.886	19.7602	21.545	15.4424	16.073	14.0805
2014.5.17	21.248	13.5551	22.407	19.7772	20.4851	16.4243	17.3352	13.83
2014.5.18	21.5024	13.847	24.3431	19.6363	20.3172	16.8058	17.8288	13.9457
2014.5.19	20.0403	12.4712	18.6424	18.4994	19.8979	15.5751	15.554	14.8035
2014.5.20	20.9552	13.7275	18.8687	19.8065	18.0518	16.1519	17.4082	14.7482
2014.5.21	21.1093	13.9043	18.5893	19.4885	19.9957	17.0724	18.4388	15.06
2014.5.22	20.2038	16.1152	21.7916	21.0599	19.5842	15.9741	18.6856	14.9503
2014.5.23	19.0354	15.2239	18.4899	19.4712	19.2599	16.6579	19.2211	16.6566
2014.5.24	19.5607	16.6334	18.4935	22.5783	20.5237	16.047	18.9992	15.0135
2014.5.25	15.7301	14.3469	19.111	19.1771	22.116	17.52	20.5509	18.7057
2014.5.26	68.2519	61.8294	57.9637	66.3123	54.8245	68.3366	67.4857	49.9782
2014.5.27	40.9669	32.263	39.1426	43.7914	34.4317	37.4781	33.1226	25.3717
2014.5.28	97.5494	63.5005	79.3324	71.167	80.4819	94.3404	75.7841	76.7078
2014.5.29	28.8903	30.0425	22.5503	21.9689	30.171	21.874	28.6499	28.8137

## Sheet: moisture andmeteorological data
	Daily moisutre conteng of litter in eight plots								Average meteorological elements of the day before sampling			Accumulated rainfall the day before sampling	Value of Daily Canadian Forest Fire Weather Index
date	Py1	Py2	Pa3	Pa4	Pa5	Po6	Py-pa7	Py-pa8	T	H	W	R	FFMC	DMC	DC	m0	ISI	BUI	FWI
2014.2.19	75.8497	86.9243	134.452	141.768	124.35	116.015	111.241	78.784	8.76722	65.1	2.016	1.2192	69.416	2.48917	6.2821	16.299	0.606472	2.50095	0.200993
2014.2.20	74.6834	51.021	83.9606	88.8057	80.7913	118.069	61.3807	51.8767	13.6178	58.3	0	0	75.6741	3.36098	8.4373	36.0635	2.48836	3.36793	0.913701
2014.2.21	42.1018	31.4483	46.2033	61.3751	51.2711	42.8727	38.164	31.3016	16.6539	42.4	6.336	0.2	84.3036	4.81361	11.139	27.579	2.63081	4.7778	1.44329
2014.2.22	19.7795	19.0424	54.1701	27.0726	27.9474	35.4095	21.775	15.0088	18.818	31.8	2.736	0.2	88.775	6.74323	14.2302	17.0908	0.725975	6.66439	0.356018
2014.2.23	22.803	20.5026	27.0624	29.4285	28.7971	24.3276	23.5316	18.4509	20.77	31.4	2.736	0	90.4267	8.87438	17.6728	12.1363	0.232173	8.76791	0.130611
2014.2.24	21.5898	18.8238	23.0239	25.6678	24.667	26.0663	21.9447	17.5609	20.198	28.5	7.236	0	91.276	11.0375	21.0125	10.381	0.161546	10.909	0.102203
2014.2.25	15.7553	17.5741	23.906	24.4192	26.3722	19.3917	18.4361	17.3758	18.961	28.2	1.8	0	91.34	13.0836	24.1295	9.49338	0.0862882	12.9388	0.0601172
2014.2.26	21.3886	17.8877	26.0129	26.35	32.3235	21.9601	22.1867	18.7288	21.485	29.3	0.9	0	91.4948	15.3518	27.7008	9.4269	0.0801677	15.1948	0.0613822
2014.2.27	20.8722	16.505	26.023	25.4577	26.1602	21.3758	19.1229	17.3864	21.294	30.6	0.9	0	91.5446	17.5594	31.2377	9.26634	0.0748038	17.3935	0.0621639
2014.2.28	20.3138	16.4043	21.5208	22.2538	26.4236	17.3346	19.0469	16.8633	20.293	25.8	9.072	0	91.9935	19.8143	34.5944	9.2147	0.110393	19.6367	0.0989223
2014.3.1	18.5398	16.0219	22.568	22.3011	32.7411	18.8707	18.6631	19.7216	21.27	25	7.236	0	92.354	22.6742	38.127	8.75125	0.0815256	22.4745	0.0796024
2014.3.2	16.2583	18.7257	20.9441	23.0939	24.1333	17.3366	18.504	15.5568	20.698	23	9.972	0	92.7182	25.5353	41.5567	8.38098	0.0782475	25.3148	0.0825416
2014.3.3	15.7793	14.8306	23.8536	21.4554	21.3431	19.2719	15.8201	20.2128	22.034	26.5	4.536	0	92.7684	28.4337	45.2268	8.00881	0.0491896	28.1964	0.0557212
2014.3.4	14.8386	19.2379	18.839	21.9519	23.6362	16.1484	18.7873	19.2537	20.722	20.5	5.436	0	93.264	31.3909	48.6607	7.95759	0.0500974	31.1343	0.0606508
2014.3.5	18.8582	18.1639	24.073	23.5333	30.5346	17.7695	21.5798	17.6648	19.865	32.7	1.8	0	92.5902	33.796	51.9404	7.45429	0.0315847	33.5294	0.0402107
2014.3.6	15.9127	18.6393	25.8732	32.5319	31.8289	21.3703	23.3039	20.8807	15.581	44	0.9	0	90.7687	35.3883	54.449	8.13935	0.043836	35.1185	0.0576035
2014.3.7	15.7575	20.3743	29.9778	27.1153	31.2169	21.529	24.622	16.7645	17.938	35.7	0	0	90.8183	37.475	57.3819	10.0224	0.0977658	37.1973	0.133658
2014.3.8	18.1318	20.8591	24.5606	24.2722	31.9981	17.5101	22.2753	21.2657	20.865	26.4	6.336	0	91.8082	40.2307	60.8416	9.97052	0.131813	39.9388	0.189315
2014.3.9	17.0914	17.4906	24.8956	21.8584	29.6174	18.7868	20.3792	24.5459	20.889	24.2	6.336	0	92.4057	43.0719	64.3056	8.94223	0.085121	42.7646	0.128238
2014.3.10	15.2652	18.9143	23.8769	26.3998	34.0103	19.0273	23.0622	16.1674	21.7	19.8	4.536	0	93.4537	46.1888	67.9156	8.32803	0.057948	45.8631	0.0917088
2014.3.11	18.5245	18.9793	25.8792	25.3426	29.2234	20.9174	22.5506	17.3102	18.485	34.1	7.236	0	92.2176	48.3889	70.9469	7.26241	0.0371281	48.0543	0.0607343
2014.3.12	17.6202	15.8773	24.9334	24.4445	28.3265	19.9069	21.7791	17.6558	21.891	25.8	3.636	0	92.3349	51.2968	74.5913	8.52091	0.0609096	50.9472	0.103872
2014.3.13	19.6241	20.171	25.5497	23.2148	31.3861	19.219	23.6973	16.9371	21.604	20	5.436	0	93.3969	54.3929	78.184	8.40058	0.0628675	54.0249	0.111809
2014.3.14	36.8667	20.1791	35.2566	36.0813	33.4524	23.4627	41.7097	22.5445	11.029	70.7	0.9	0	87.7031	54.9987	79.8732	7.3198	0.0279116	54.6349	0.0500427
2014.3.15	27.2075	23.9551	39.8704	41.8435	45.7041	28.4832	33.5453	24.6345	22.417	25.8	3.636	0	91.4295	57.9732	83.6123	13.2966	0.336615	57.5936	0.626889
2014.3.16	19.3057	19.2041	27.3708	26.4379	33.0104	22.7428	24.7769	19.3934	21.748	22.7	2.736	0	92.6769	60.9837	87.2309	9.33401	0.0845009	60.5867	0.163245
2014.3.17	18.6045	37.9398	47.1926	26.8823	29.8061	17.4386	23.2984	19.7548	24.219	17	7.236	0	94.4852	64.5659	91.2943	8.05094	0.0576177	64.1458	0.116027
2014.3.18	17.6328	15.7986	26.1627	24.7428	30.0003	18.6094	19.3349	18.1116	23.954	22.1	3.636	0	94.536	67.8928	95.31	6.22773	0.0157746	67.4528	0.0329534
2014.3.19	23.5125	17.8375	25.3959	25.1575	34.9226	17.3533	20.9793	18.0144	24.46	22.2	7.236	0	94.5869	71.2825	99.4168	6.1771	0.0182358	70.822	0.0394802
2014.3.20	17.9313	18.7432	27.414	30.9674	31.8963	20.79	21.623	16.8156	24.46	23.8	0.9	0	94.6194	74.6025	103.524	6.12648	0.0127732	74.122	0.0285958
2014.3.21	25.4885	24.7031	35.7643	37.4711	41.2317	26.2118	26.5597	27.039	17.534	49.5	0	0	91.4375	76.2066	106.384	6.0941	0.0119208	75.7228	0.0271114
2014.3.22	65.0679	63.8443	88.3351	78.76	98.4207	39.7158	89.3543	83.8939	16.153	57.3	0	2.8	47.3646	61.6495	108.995	9.32567	0.0733536	61.3976	0.143084
2014.3.23	66.8266	66.7226	97.7279	99.0972	111.687	70.2457	100.048	93.3642	17.938	61	0	3.2	23.0402	48.5848	108.361	73.8797	0.63538	48.5115	1.2388
2014.3.24	71.0341	72.9097	147.688	99.5866	111.079	106.541	118.965	84.6228	15.223	58.2	1.8	5.2	4.72026	32.757	103.02	139.031	0.00268984	36.4997	0.00362963
2014.3.25	30.5489	32.8062	50.8493	50.6904	53.3425	34.6817	42.3941	35.8912	20.698	33.1	0.9	0	47.8527	35.2428	106.449	220.684	4.2114e-07	38.5654	5.90327e-07
2014.3.26	34.0034	27.0624	48.8328	52.467	50.3099	33.0319	37.9625	28.3402	20.412	39.5	0	0	69.9836	37.4613	109.828	72.8747	0.677888	40.439	0.982091
2014.3.27	28.5917	25.3402	35.0687	31.2137	37.9758	25.9691	30.6001	21.4955	23.16	31.2	1.8	0	85.6768	40.3064	113.7	35.2602	2.69825	42.7373	7.1869
2014.3.28	22.1014	21.7322	30.4225	28.4781	33.7615	22.8118	23.9386	19.837	21.246	37.5	2.736	0	88.7463	42.6871	117.229	15.5367	0.541256	44.6906	0.841079
2014.3.29	23.3807	21.3146	66.8335	76.9847	40.4841	23.807	27.7262	18.6027	21.342	42.5	0	0	88.8867	44.8867	120.774	12.1672	0.204154	46.5354	0.326438
2014.3.30	21.8364	20.304	27.591	27.329	30.7188	19.8636	24.1045	21.3202	25.72	28.3	3.636	0	91.8241	48.1647	125.108	12.0165	0.234281	49.0859	0.389069
2014.3.31	23.0246	20.876	31.7374	22.7816	29.5627	20.5349	24.0361	21.8563	24.388	27	1.8	0	92.3733	51.3363	129.202	8.92585	0.0672226	51.5079	0.115537
2014.4.1	24.214	23.3683	32.0007	27.3079	30.3273	23.7544	25.4487	24.9813	21.27	39	2.736	0	91.5599	54.6444	133.984	8.36129	0.0538101	54.6312	0.0964713
2014.4.2	16.5223	19.5464	25.5853	29.4958	30.2756	21.4002	20.7854	16.5248	24.146	26.2	7.236	0	92.4766	59.1613	139.285	9.1989	0.0999409	59.1183	0.189672
2014.4.3	22.1389	21.2328	28.8848	26.506	28.5894	18.6677	21.6563	18.919	23.424	22.3	1.8	0	93.2046	63.7809	144.455	8.25551	0.0486747	63.7068	0.0975287
2014.4.4	15.8788	17.47	26.6327	29.4463	22.868	17.1864	18.7946	11.9671	24.002	34	0	0.8	86.2839	67.7973	149.729	7.5144	0.0298562	67.7004	0.0625375
2014.4.5	12.8316	18.738	26.211	31.1248	20.9066	12.9216	20.1312	16.9969	14.361	53.9	0	0	86.332	69.5253	153.268	14.8591	0.408269	69.4252	0.871073
2014.4.6	36.1118	34.2678	50.5704	45.8365	58.8736	29.3415	57.9931	48.398	19.746	49.8	0	1	75.1743	72.0623	157.777	14.8056	0.403467	71.9539	0.883737
2014.4.7	30.864	26.711	42.2356	36.5088	42.0284	29.1264	31.9311	26.435	21.294	42.9	0	0	83.2239	75.1622	162.563	28.2276	1.97927	75.0401	7.83332
2014.4.8	26.1909	23.9697	33.9788	31.0827	37.7046	29.0989	24.7428	26.0768	20.126	48.1	0	0	85.7827	77.8329	167.14	18.3336	0.774614	77.7012	3.06732
2014.4.9	28.382	27.3405	35.872	31.7155	37.2426	24.3164	28.6132	23.5458	23.256	42.4	0	0	88.0156	81.234	172.28	15.4182	0.460157	81.0865	1.41426
2014.4.10	23.8861	23.1442	32.7086	31.3824	28.1768	21.9474	23.9908	21.8441	28.023	22.4	0.9	0	92.9847	86.7129	178.278	12.9566	0.267748	86.5276	0.671914
2014.4.11	19.8711	20.2238	26.573	24.8509	27.6744	18.6049	23.5244	20.9023	26.549	23.3	3.636	0	93.5807	91.8541	184.011	7.73752	0.040628	91.6333	0.106347
2014.4.12	20.2838	20.3678	27.6685	25.391	31.1568	17.2802	20.5473	18.1135	26.622	14.7	1.8	0	95.3794	97.5868	189.757	7.1343	0.0261403	97.322	0.0714526
2014.4.13	16.1033	14.5774	21.2804	21.7034	22.2443	16.5455	18.3357	16.0999	27.382	15.5	0.9	0	95.6163	103.421	195.64	5.34193	0.00686955	103.111	0.0195491
2014.4.14	18.1957	16.3113	24.3681	22.9425	25.5284	16.9474	23.4199	17.4684	28.295	19	3.636	0	95.6675	109.194	201.687	5.10898	0.00642446	108.838	0.0189576
2014.4.15	20.979	17.4798	24.222	21.9288	34.295	15.1232	20.7504	17.6248	27.751	16.5	3.636	0	95.7187	115.034	207.636	5.05871	0.00613797	114.63	0.0187247
2014.4.16	22.0211	14.8353	24.961	20.465	20.6226	14.5591	19.9085	15.837	25.695	17.2	7.236	0	95.77	120.413	213.215	5.00846	0.00702708	119.963	0.022041
2014.4.17	15.7496	14.4871	24.787	19.771	21.2405	15.068	18.4581	16.9193	26.036	19.4	7.236	0	95.811	125.715	218.856	4.95822	0.00670682	125.22	0.0215667
2014.4.18	19.0727	12.1426	33.7257	20.8653	17.6255	14.616	16.8181	16.2027	26.671	19.4	6.336	0	95.8623	131.142	224.611	4.91797	0.00617185	130.599	0.0203099
2014.4.19	15.6872	12.863	21.5152	20.0766	16.8943	15.2641	17.134	14.7838	28.742	19.2	0	0	95.9136	136.987	230.738	4.86776	0.00427645	136.392	0.0143909
2014.4.20	15.017	15.1041	21.2467	20.7993	17.3674	15.3669	16.6238	15.7009	30.066	17.3	2.736	0	95.9649	143.236	237.104	4.81757	0.00467783	142.581	0.0160803
2014.4.21	15.1708	14.3151	17.79	17.3648	15.9889	14.8143	16.311	14.597	28.444	21.5	5.436	0	95.8462	148.858	243.178	4.7674	0.00510477	148.15	0.0178496
2014.4.22	20.4218	16.2727	26.4279	22.1824	22.5928	18.2321	19.551	16.9217	30.066	16.9	2.736	0	95.8975	155.137	249.544	4.88352	0.00498279	154.365	0.0177201
2014.4.23	16.3996	12.7473	18.6649	19.1555	15.647	13.884	15.2567	12.9459	29.439	15.6	4.536	0	95.9488	161.386	255.797	4.83332	0.00520027	160.548	0.0187696
2014.4.24	16.9659	14.2798	20.8978	17.4178	15.647	12.708	16.3619	13.661	29.065	19.4	5.436	0	96.0001	167.28	261.983	4.78315	0.00518373	166.38	0.0189421
2014.4.25	15.7819	11.4059	19.1865	17.3023	16.8048	12.8957	14.8181	13.4417	28.295	15.6	5.436	0	96.0515	173.294	268.03	4.73298	0.00493534	172.328	0.018236
2014.4.26	16.9483	13.0089	20.1434	18.5005	18.8818	13.7137	15.4963	14.7592	28.419	21.2	1.8	0	95.9404	178.934	274.099	4.68284	0.00390994	177.906	0.014581
2014.4.27	16.6111	17.9856	25.8176	24.7063	19.2919	19.7339	18.6497	19.8271	16.344	73	2.736	0	87.589	180.075	277.995	4.79136	0.00456063	179.055	0.0170377
2014.4.28	15.1054	17.0549	21.0858	23.7699	19.6629	19.47	17.4073	18.5957	23.136	41.7	0.9	0	88.872	183.501	283.113	13.4211	0.302937	182.453	1.52301
2014.4.29	20.8298	21.7081	28.9069	27.5653	26.9894	23.1313	23.4736	19.5554	21.867	34.2	3.636	0	90.2057	187.165	288.003	12.0322	0.235411	186.083	0.88821
2014.4.30	91.0789	60.3881	94.2087	79.8716	79.4597	118.465	94.7475	63.0402	18.628	65.5	0	19.6	0	69.3814	235.837	10.6137	0.122248	79.9564	0.289436
2014.5.1	33.8721	31.4653	40.3939	43.9021	39.3616	49.0288	36.7789	28.6113	26.549	39.5	0.9	0	50.1034	73.7852	243.02	249.869	1.50291e-08	83.8923	3.68574e-08
2014.5.2	108.987	77.5998	98.7512	87.4661	99.6173	99.8625	86.1094	84.9504	13.257	92.3	0.9	42.81	0	29.0945	139.933	68.3554	0.93694	38.2874	1.96483
2014.5.3	102.749	83.5926	97.4123	106.327	96.2984	130.212	108.072	100.05	20.65	71.7	0.9	12	0	14.8516	122.491	249.869	1.50291e-08	22.794	1.48086e-08
2014.5.4	54.9525	41.5295	59.3425	59.2192	49.3021	74.3518	49.7036	48.6	14.17	77.7	8.172	0	25.027	15.7481	127.446	249.869	2.16808e-08	24.0628	2.21254e-08
2014.5.5	84.6022	86.4394	113.118	77.745	91.8859	119.736	91.8163	91.831	11.467	89	0	10.6	0	7.97077	112.037	132.304	0.00473865	13.5343	0.00338869
2014.5.6	52.5937	63.5138	74.4926	68.9837	67.6556	93.0752	74.0435	60.8868	16.344	82.4	0	0	10.051	8.77904	117.382	249.869	1.43627e-08	14.7923	1.08226e-08
2014.5.7	48.4022	48.6756	61.5527	55.2397	51.2144	63.2884	53.5961	42.3575	18.58	65.1	0.9	0.2	36.0754	10.5872	123.131	192.488	9.64653e-06	17.4281	8.02632e-06
2014.5.8	27.4529	30.2109	44.4657	40.7623	42.9414	42.507	35.2534	27.2726	19.318	57.4	1.8	0	61.5818	12.8771	129.012	99.9934	0.0974879	20.6111	0.0900697
2014.5.9	23.6503	26.3192	36.921	30.1161	29.0721	28.2291	25.5392	22.4195	21.772	48.7	5.436	0	80.1602	15.9661	135.335	47.9209	2.92392	24.6593	5.44607
2014.5.10	25.9333	28.898	37.0198	31.3775	30.047	27.1926	27.2768	25.8644	22.92	45.6	4.536	0	86.5165	19.4062	141.865	21.9648	1.54649	28.9216	3.0381
2014.5.11	26.0097	24.7054	35.6994	28.345	30.8864	24.1054	26.8129	21.5232	23.569	51.1	0	0	87.2949	22.582	148.511	14.6009	0.385354	32.7242	0.482546
2014.5.12	24.7769	19.9411	31.2851	27.0288	25.6235	23.0669	22.2149	21.7223	21.581	58.1	0	0	87.3434	25.0839	154.8	13.7429	0.314181	35.704	0.41757
2014.5.13	22.4177	18.8348	30.3396	21.3009	28.0137	20.7222	22.3643	22.2007	27.456	31	5.436	0	91.4724	30.2712	162.146	13.6898	0.407725	41.2772	0.599213
2014.5.14	23.1863	14.8432	23.2488	19.6376	21.3546	17.7205	18.0143	15.8677	27.974	30.4	4.536	0	92.2738	35.5985	169.585	9.28952	0.0907564	46.6931	0.145466
2014.5.15	30.1016	15.7637	26.0621	23.5685	25.5271	18.9488	19.1368	17.0438	27.85	28.4	0.9	0	92.7051	41.0556	177.002	8.46327	0.0515919	51.9732	0.0892447
2014.5.16	19.9798	13.2751	20.886	19.7602	21.545	15.4424	16.073	14.0805	28.023	28	2.736	0	92.8869	46.5759	184.45	8.02214	0.0452402	57.1035	0.0837339
2014.5.17	21.248	13.5551	22.407	19.7772	20.4851	16.4243	17.3352	13.83	29.74	25.6	1.8	0	93.5966	52.6165	192.207	7.83695	0.0391007	62.4761	0.0772413
2014.5.18	21.5024	13.847	24.3431	19.6363	20.3172	16.8058	17.8288	13.9457	30.773	24.3	0.9	0	94.0899	58.9685	200.151	7.11826	0.0247386	67.9145	0.0519379
2014.5.19	20.0403	12.4712	18.6424	18.4994	19.8979	15.5751	15.554	14.8035	27.604	34.8	0	0	93.4854	63.8956	207.523	6.62259	0.017246	72.209	0.0378733
2014.5.20	20.9552	13.7275	18.8687	19.8065	18.0518	16.1519	17.4082	14.7482	27.407	36.9	0	0	92.9627	68.6312	214.86	7.23044	0.0252973	76.3181	0.0578668
2014.5.21	21.1093	13.9043	18.5893	19.4885	19.9957	17.0724	18.4388	15.06	28.419	34.9	5.436	0	93.013	73.6903	222.38	7.7599	0.0450347	80.6051	0.107186
2014.5.22	20.2038	16.1152	21.7916	21.0599	19.5842	15.9741	18.6856	14.9503	27.825	32.5	2.736	0	93.0634	78.8304	229.792	7.70876	0.0382164	84.8722	0.0945369
2014.5.23	19.0354	15.2239	18.4899	19.4712	19.2599	16.6579	19.2211	16.6566	32.33	25.8	1.8	0	93.9856	85.3608	238.016	7.65763	0.0354371	90.0151	0.0915592
2014.5.24	19.5607	16.6334	18.4935	22.5783	20.5237	16.047	18.9992	15.0135	31.484	30.4	0.9	0	94.0362	91.3312	246.087	6.72718	0.0193332	94.75	0.0518454
2014.5.25	15.7301	14.3469	19.111	19.1771	22.116	17.52	20.5509	18.7057	30.773	36.5	0.9	0	93.4581	96.6596	254.03	6.67638	0.0187	99.0739	0.0517623
2014.5.26	68.2519	61.8294	57.9637	66.3123	54.8245	68.3366	67.4857	49.9782	27.038	56.9	0	2.8	48.2614	77.2687	261.301	7.25802	0.0257167	88.8519	0.0658127
2014.5.27	40.9669	32.263	39.1426	43.7914	34.4317	37.4781	33.1226	25.3717	20.412	65.4	8.172	1.2	40.5902	79.2282	267.379	72.0399	1.079	91.0258	5.04836
2014.5.28	97.5494	63.5005	79.3324	71.167	80.4819	94.3404	75.7841	76.7078	22.657	82.6	0	30	0	34.3435	192.064	88.8431	0.218454	47.4675	0.354246
2014.5.29	28.8903	30.0425	22.5503	21.9689	30.171	21.874	28.6499	28.8137	28.493	49.5	0	0	40.2534	38.2779	199.596	249.869	1.43627e-08	51.7464	2.47673e-08
